# Supplementary material for: Relative strength of 5’ splice-site strength defines functions of SRSF2 and SRSF6 in alternative splicing of Bcl-x pre-mRNA
Source: PubMed Central journal article supplement — BMB Rep. 2021 Mar 31;54(3):176–81. doi: 10.5483/BMBRep.2021.54.3.170 (PMC8016662; doi:10.5483/bmbrep.2021.54.3.170), 2021-03-31
Supplement: bmb-54-3-176-supple.pdf [file bmb-54-3-176-supple.pdf]

# Relative strength of 5' splice-site strength defines functions of SRSF2 and SRSF6 in alternative splicing of Bcl-x pre-mRNA

Namjeong Choi<sup>a</sup>, YongChao Liu<sup>a</sup>, Jagyeong Oh<sup>a</sup>, Jiyeon Ha<sup>a</sup>, Claudia Ghigna<sup>b</sup>, Xuexiu Zheng<sup>a,\*</sup> and Haihong Shen<sup>a,\*</sup>

<sup>a</sup>School of life Sciences, Gwangju Institute of Science and Technology, Gwangju 500-712, Korea.

<sup>b</sup>Institute of Molecular Genetics "Luigi Luca Cavalli-Sforza", National Research Council, Via Abbiategrosso 207, 27100 Pavia, Italy

\*Corresponding author: Phone: 82-62-715-2507, Fax: 82-62-715-2484, E-mail address: haihongshen@gist.ac.kr

\*Corresponding author: Phone: 82-62-715-2513, Fax: 82-62-715-2484, E-mail address: xuexiuzheng@gist.ac.kr

## Running title:

5' splice site determines splicing of Bcl-x

## Key words:

SRSF2, SRSF6, 5' splice-site, Bcl-x, alternative splicing

**Supplementary Figure 1. Multiple potential binding motifs of SRSF2 and SRSF6 are predicted in the Bcl-x minigene.**

Sequences of Bcl-x minigene are shown. Exon is shown with upper case. Introns are shown with lower case. Potential binding sites of SRSF2 and SRSF6 are shown with red and blue colors separately. Overlapped binding sites of SRSF2 and SRSF6 are shown in orange. 5' splice-sites show shown with slashes. Sequences analyzed in Figure 3 for potential SRSF2 and SRSF6 sites are shown with “SRSF2” and “SRSF6”.

CTCTTTCTCTCCCTTCAGAAATCTTATCTTGGCTTTGGATCTTGAAGAGAATCACTAACCCAGAGACGAGACTCAGTGAGTGAG  
CAGGTGTTTTGGACAATGGACTGGTTGAGCCATCCCTATTATAAAAAATGTCTCAGAGCAACCGGGAGCTGGTGGTTGACTTT  
CTCTCTACAAGCTTCCAGAAAAGGATACAGCTGGAGTCAGTTTAGTGATGTGGAAGAGAACAGGACTGAGGCCCCAGAAG  
GGACTGAATCGGAGATGGAGACCCCAAGTGCCATCAATGGCAACCCATCCTGGCACCTGGCAGACAGCCCCGCGGTGAATGG  
AGCCACTGGCCACAGCAGCAGTTTGGATGCCCGGGAGGTGATCCCCATGGCAGCAGTAAAGCAAGCGCTGAGGGAGGCAGG  
CGACGAGTTTGAACGCGGTACCGGCGGGCATTCACTGACCTGACATCCAGCTCCACATCACCCAGGGACAGCATATCAG  
AGCTTTGAAACAG /5'(S) GTAGTGAATGAACTCTCCGGGATGGGGTAAACTGGGGT

SRSF6: [CGCATGTGGCCTTTTCTCTTCGGCGGGCACTGTGCGTGAAAGCG]

TAGACAAAGGAGATGCAGGTATTGGTGAGTCGGATCGCAGCTTGGATGGCCACTTACCTGAATGACCACCTAGAGCCTTGGAT

SRSF2: [CCAGGAGAACGGCGGCTGG /5'(L) gtaagaaccaa]

gcccctgtgtgccctttttggcctctgfcagagatccccacagcccttctctgtatctctttctgtgtgtgggtgattgttgagacggtgatagtgaggaaacctgactggcctcattaccacaa  
gaggttaactcttgaaatacaaatgacctgtgcttcagagatcaggcatcttaccctgtctctacctgtttctcagcagtaacatggttgattatcaccaatggagggtcaagaagagaccacc  
ttagccctttacctggccccagatgggcacagatggctacagttttcacatcaaccaagccatagcatgcagatggccccttccccacccacctacatcactctctgaggactaaaactgcacctctct  
ctctccctgcag /3'

GATACTTTGTGAACTCTATGGGAACAATGCAGCAGCCGAGAGCCGAAAAGGGCCAGGAACGCTTCAACCGCTGGTTCCTGA  
CGGGCATGACTGTGGCCGGCGTGGTTCTGCTGGGCTCACTCTTCAGTCGGAAA

Supplementary Table 1. Primer list.

| Primer Name           | Sequence (5'-3')                          |
|-----------------------|-------------------------------------------|
| (N)E2aF               | GCACAGCTAGCCTCTTTCTCTCCCTTCAGAATCTTATCTTG |
| (E)E3R                | ATCTGGAATTCTTTCCGACTGAAGAGTGAGCCCAGCAG    |
| I2F                   | ATCTTTCACCCTGGTCTCTACCTGTTTCTC            |
| I2R                   | GAGAAACAGGTAGAGACCAGGGTGAAAGAT            |
| bm1                   | TCCCAGTTCAATTACAGCTCTTA                   |
| bm2                   | ATTGTTCCCATAGAGTTCCAC                     |
| be1                   | ATGTCTCAGAGCAACCGGGA                      |
| be2                   | TCATTTCCGACTGAAGAGTG                      |
| SRSF <sub>2</sub> M1F | GGATCCAGGAAAACGGCGGTTGGGTAAGAA            |
| SRSF <sub>2</sub> M1R | TTCTTACCCAACCGCCGTTTTCTGGATCC             |
| SRSF <sub>2</sub> M2F | GATCCAGGAGTACGGCGGTTGGGTAAGAA             |
| SRSF <sub>2</sub> M2R | TTCTTACCCAACCGCCGTAATCCTGGATC             |
| SRSF <sub>2</sub> M3F | GATCCAGGAAAACGGCGGCT                      |
| SRSF <sub>2</sub> M3R | AGCCGCCGTTTTCTGGATC                       |
| SRSF <sub>2</sub> M4F | GAACGGCGGTTGGGTAAGAAC                     |
| SRSF <sub>2</sub> M4R | GTTCTTACCCAACCGCCGTTCC                    |
| SRSF <sub>2</sub> M5F | GGATCCAGGAAGGCAACGATTGGGTAAGAA            |
| SRSF <sub>2</sub> M5R | TTCTTACCCAATCGTTGCCTTCTGGATCC             |
| SRSF <sub>2</sub> M6F | GGATCCAGGAGGGCAATAGCTGGGTAAG              |
| SRSF <sub>2</sub> M6R | CTTACCCAGCTATTGCCCTCCTGGATCC              |
| SRSF <sub>6</sub> M1F | GGGGTCGCATTGTGATCTTTTTCTCCTTCGG           |
| SRSF <sub>6</sub> M1R | CCGAAGGAGAAAAAGATCACAATGCGACCCC           |
| SRSF <sub>6</sub> M2F | GGCCTTTTTCTCCCTTGGCGGGGCACTG              |
| SRSF <sub>6</sub> M2R | CAGTGCCCCGCCAAGGGAGAAAAAGGCC              |
| SRSF <sub>6</sub> M3F | GCGGGGCACTGCACGAGGAAAGCGTAGA              |
| SRSF <sub>6</sub> M3R | TCTACGCTTTCCTCGTGCAGTGCCCCGC              |
| SRSF <sub>6</sub> M4F | GATCTTTTTCTCCCTTGGCGGGGCACTG              |
| SRSF <sub>6</sub> M4R | CAGTGCCCCGCCAAGGGAGAAAAAGATC              |
| E2aD1F                | GCAAGGCTAGCGATGCCCGGGAGGTGATCCC           |
| E2aD2F                | GCATGGCTAGCGGCAGGCGACGAGTTTGAAGTG         |
| E2aD3F                | GCTTCGCTAGCCATCCAGCTCCACATCACCC           |
| E2bD1F                | AACAGGTAGTGAATGGGGGCACTGTGCGTG            |
| E2bD1R                | CACGCACAGTGCCCCATTCACTACCTGTT             |
| E2bD2F                | TTTGAACAGGTAGTGGCTTGGATGGCCACT            |
| E2bD2R                | AGTGGCCATCCAAGCCACTACCTGTTCAA             |
| E2bD3F                | TTTTTCTCCTTCGGCCGAGCTTGGATGG              |
| E2bD3R                | CCATCCAAGCTGCGGCCGAAGGAGAAAA              |

|         |                                     |
|---------|-------------------------------------|
| E2bD4F  | ATTGGTGAGTCGGATCGGCGGCTGGGTAAG      |
| E2bD4R  | CTTACCCAGCCGCCGATCCGACTCACCAAT      |
| Inv1F   | TCAGAGCTTTGAATGGGTAAGAAATGAACTCTTCC |
| Inv1R   | GGAAGAGTTCATTTCTTACCCATTCAAAGCTCTGA |
| Inv2F   | GAACGGCGGCCAGGTAGTGACCAAGCCC        |
| Inv2R   | GGGCTTGGTCACTACCTGGCCGCCGTTT        |
| Cons2aF | GAACAGGTAAGTAATGAACTCTTCCGG         |
| Cons2aR | GTTCACTACTTACCTGTTCAAAGCTC          |
| W2aF    | GCTTTGAAAGGGTAGTGAATGAACTC          |
| W2aR    | ATTCACTACCCTTTCAAAGCTCTGATA         |
| Cons2bF | CTGGGTAAGTACCAAGCCCCTTGTG           |
| Cons2bR | CTTGGTACTTACCCAGCCGCCGTT            |
| W2bF    | CTGGGTAAGTAACCAAGCCCCTTGTG          |
| W2bR    | CTTGGTACTTACCCAGCCGCCGTT            |
